# Supplementary material
Source: Springer Nature journal article supplement (https://www.springermedizin.de/resource/supplementary/12888_2012_1199_MOESM2_ESM.pdf/9480072)
Supplement: MOESM2 [file 9480072]

## Clinician 6-Item HAM-D Responses

1. Depressed mood

.77 \*

2. Self-esteem and guilt

.72 (8.57)

3. Social interaction and interests

**.76 (8.97)**

4. Psychomotor retardation

**.27 (3.10)**

5. Anxiety

.77 (9.14)

6. Somatic symptoms

.59 (6.94)

**Depressive  
Symptoms**
